# Supplementary material
Source: MDPI journal article supplement (https://www.mdpi.com/2079-9284/11/2/58)
Supplement: s1 [file s1]

Archive with 1 entries (1 files):
- cosmetics-2916616-supplementary.pdf
